# Supplementary material for: MASTER Real-Time Multi-Message Observations of High Energy Phenomena
Source: MDPI journal article supplement (doi:10.3390/universe8050271), 2022-05-05
Supplement: s1 [file s1]

## Supplementary information

### 1. The results of the search for a signal by the coincidence method from FRB180916.J0158+65.

**Table S1.** Objects detected simultaneously in two MASTER-Kislovodsk east and west cameras in place of the FRB, and in two randomly selected empty places. A group of 3 pixels, each of which exceeds the background level by 1 sigma was called an object.

| Date, time      | Camera EAST                   |      | Camera WEST                   |      | Position     |
|-----------------|-------------------------------|------|-------------------------------|------|--------------|
|                 | Coord J2000                   | Mag  | Coord J2000                   | Mag  |              |
| 2020/5/19 23:15 | 01h 58m 00.42s,+65d 43m 03.1s | 18.3 | 01h 58m 00.54s,+65d 43m 01.3s | 18.8 | FRB position |
| 2020/4/26 18:57 | 01h 58m 00.82s,+65d 42m 58.1s | 18.5 | 01h 58m 01.19s,+65d 42m 59.2s | 18.1 | FRB position |
| 2020/4/26 19:32 | 01h 58m 00.16s,+65d 42m 57.7s | 18.2 | 01h 58m 00.10s,+65d 43m 00.1s | 18.5 | FRB position |
| 2020/4/25 18:28 | 01h 58m 01.20s,+65d 43m 03.6s | 18.5 | 01h 58m 01.14s,+65d 43m 02.8s | 18.2 | FRB position |
| 2020/5/19 21:12 | 01h 58m 00.40s,+65d 43m 02.2s | 18.6 | 01h 58m 00.51s,+65d 43m 04.7s | 18.1 | FRB position |
| 2020/5/17 22:09 | 01h 58m 01.34s,+65d 43m 02.2s | 18.3 | 01h 58m 01.11s,+65d 43m 01.6s | 18.4 | FRB position |
| 2020/5/19 22:20 | 01h 58m 00.33s,+65d 43m 03.8s | 17.5 | 01h 58m 00.63s,+65d 43m 04.1s | 17.9 | FRB position |
| 2020/5/15 21:36 | 01h 58m 00.49s,+65d 43m 00.0s | 18.3 | 01h 58m 00.21s,+65d 43m 01.2s | 18.4 | FRB position |
| 2020/5/15 23:06 | 01h 58m 00.12s,+65d 42m 59.9s | 16.9 | 01h 58m 00.16s,+65d 42m 59.9s | 16.9 | FRB position |
| 2020/5/19 20:42 | 01h 58m 00.52s,+65d 42m 56.7s | 18   | 01h 58m 00.86s,+65d 42m 55.6s | 18.6 | FRB position |
| 2020/5/19 23:38 | 01h 58m 00.18s,+65d 42m 59.0s | 18   | 01h 58m 00.35s,+65d 43m 00.0s | 18.2 | FRB position |
| 2020/5/15 22:49 | 01h 58m 00.27s,+65d 42m 56.8s | 17.3 | 01h 58m 00.52s,+65d 42m 55.6s | 17   | FRB position |
| 2020/5/15 22:57 | 01h 58m 01.15s,+65d 43m 00.3s | 17.3 | 01h 58m 01.25s,+65d 42m 57.7s | 17.8 | FRB position |
| 2020/4/26 19:49 | 01h 58m 00.59s,+65d 42m 57.0s | 18.1 | 01h 58m 00.18s,+65d 42m 57.1s | 18.5 | FRB position |
| 2020/5/19 20:28 | 01h 58m 01.00s,+65d 43m 02.5s | 17.9 | 01h 58m 01.23s,+65d 43m 01.3s | 18.4 | FRB position |
| 2020/5/15 22:37 | 01h 58m 00.72s,+65d 43m 00.5s | 17.4 | 01h 58m 00.38s,+65d 43m 02.6s | 18.4 | FRB position |
| 2020/4/26 20:45 | 01h 58m 01.22s,+65d 43m 01.3s | 18.1 | 01h 58m 01.43s,+65d 42m 59.5s | 18.4 | FRB position |
| 2020/4/24 20:26 | 01h 58m 00.55s,+65d 42m 58.0s | 18.2 | 01h 58m 00.91s,+65d 42m 58.6s | 17.8 | FRB position |
| 2020/4/25 17:14 | 01h 58m 00.53s,+65d 42m 56.0s | 17.5 | 01h 58m 00.34s,+65d 42m 57.0s | 16.8 | FRB position |
| 2020/5/17 21:51 | 01h 58m 00.39s,+65d 43m 02.6s | 17.5 | 01h 58m 00.48s,+65d 43m 00.9s | 17.8 | FRB position |
| 2020/4/26 20:48 | 01h 58m 00.61s,+65d 43m 01.7s | 18.5 | 01h 58m 00.27s,+65d 43m 03.0s | 18.4 | FRB position |
| 2020/5/17 18:17 | 01h 58m 00.96s,+65d 43m 00.0s | 17.1 | 01h 58m 01.19s,+65d 43m 01.6s | 17.8 | FRB position |
| 2020/4/25 20:32 | 01h 58m 00.95s,+65d 43m 03.2s | 18.1 | 01h 58m 01.11s,+65d 43m 01.8s | 18.4 | FRB position |
| 2020/5/15 23:33 | 01h 58m 00.43s,+65d 42m 58.1s | 18.1 | 01h 58m 00.28s,+65d 42m 59.0s | 18.5 | FRB position |
| 2020/5/15 22:41 | 01h 58m 00.10s,+65d 43m 00.7s | 17.8 | 01h 58m 00.31s,+65d 42m 59.9s | 18.5 | FRB position |
| 2020/4/24 20:27 | 01h 58m 00.94s,+65d 42m 57.7s | 17.8 | 01h 58m 01.15s,+65d 43m 00.3s | 18.5 | FRB position |

|                 |                               |      |                               |      |              |
|-----------------|-------------------------------|------|-------------------------------|------|--------------|
| 2020/5/15 23:34 | 01h 58m 00.25s,+65d 42m 56.8s | 18.1 | 01h 58m 00.71s,+65d 42m 57.2s | 17.9 | FRB position |
| 2020/4/24 17:58 | 01h 58m 00.75s,+65d 43m 01.0s | 18.6 | 01h 58m 01.14s,+65d 43m 02.6s | 18.3 | FRB position |
| 2020/5/19 23:52 | 01h 58m 00.64s,+65d 43m 00.9s | 18.5 | 01h 58m 00.66s,+65d 43m 03.3s | 17.5 | FRB position |
| 2020/4/25 18:08 | 01h 58m 00.87s,+65d 42m 59.7s | 18.3 | 01h 58m 01.25s,+65d 42m 59.6s | 18.2 | FRB position |
| 2020/5/17 18:52 | 01h 58m 00.47s,+65d 43m 03.0s | 17.3 | 01h 58m 00.43s,+65d 43m 03.7s | 17.9 | FRB position |
| 2020/5/17 22:23 | 01h 58m 00.94s,+65d 43m 03.5s | 18.1 | 01h 58m 00.77s,+65d 43m 04.2s | 18.1 | FRB position |
| 2020/5/14 22:21 | 01h 58m 00.48s,+65d 43m 00.6s | 17.8 | 01h 58m 00.25s,+65d 42m 59.9s | 18   | FRB position |
| 2020/5/14 21:04 | 01h 58m 00.74s,+65d 42m 57.2s | 17.5 | 01h 58m 00.49s,+65d 42m 59.4s | 17.7 | FRB position |
| 2020/5/14 23:22 | 01h 58m 00.71s,+65d 43m 01.5s | 16.2 | 01h 58m 00.79s,+65d 42m 59.3s | 18.4 | FRB position |
| 2020/5/14 23:18 | 01h 58m 00.65s,+65d 43m 01.1s | 18.1 | 01h 58m 00.51s,+65d 43m 00.9s | 18.2 | FRB position |
| 2020/5/19 22:21 | 01h 58m 00.76s,+65d 42m 58.9s | 18.7 | 01h 58m 00.68s,+65d 42m 58.4s | 18.4 | FRB position |
| 2020/4/26 19:43 | 01h 58m 00.57s,+65d 42m 58.1s | 18.1 | 01h 58m 00.36s,+65d 42m 57.8s | 18.2 | FRB position |
| 2020/5/19 23:57 | 01h 58m 00.69s,+65d 43m 02.4s | 18.1 | 01h 58m 00.52s,+65d 43m 02.7s | 17.9 | FRB position |
| 2020/5/14 23:49 | 01h 58m 00.75s,+65d 43m 03.9s | 18.2 | 01h 58m 00.84s,+65d 43m 04.5s | 17.7 | FRB position |
| 2020/5/15 19:29 | 01h 58m 00.80s,+65d 42m 58.0s | 17.4 | 01h 58m 00.93s,+65d 42m 56.0s | 17.4 | FRB position |
| 2020/5/15 20:25 | 01h 58m 01.47s,+65d 43m 01.5s | 17.7 | 01h 58m 01.12s,+65d 43m 02.9s | 17.8 | FRB position |
| 2020/5/14 20:43 | 01h 58m 01.40s,+65d 42m 58.5s | 17.3 | 01h 58m 01.35s,+65d 42m 57.0s | 17.4 | FRB position |
| 2020/5/19 20:31 | 01h 58m 00.25s,+65d 42m 58.9s | 18.1 | 01h 58m 00.14s,+65d 43m 00.2s | 18.4 | FRB position |
| 2020/5/19 21:19 | 01h 58m 00.92s,+65d 43m 01.5s | 18.1 | 01h 58m 00.89s,+65d 43m 04.4s | 18.8 | FRB position |
| 2020/5/15 22:40 | 01h 58m 01.26s,+65d 43m 03.1s | 18.4 | 01h 58m 00.85s,+65d 43m 04.3s | 18.6 | FRB position |
| 2020/5/17 19:58 | 01h 58m 00.32s,+65d 42m 58.3s | 17.3 | 01h 58m 00.22s,+65d 42m 59.9s | 16.9 | FRB position |
| 2020/4/6 21:48  | 01h 58m 01.08s,+65d 43m 02.6s | 19   | 01h 58m 01.21s,+65d 43m 02.2s | 18.7 | FRB position |
| 2020/5/14 19:16 | 01h 58m 01.10s,+65d 43m 01.2s | 18.2 | 01h 58m 01.19s,+65d 43m 03.5s | 17.7 | FRB position |
| 2020/4/26 19:01 | 01h 58m 00.40s,+65d 42m 57.2s | 18.1 | 01h 58m 00.67s,+65d 42m 56.2s | 18.4 | FRB position |
| 2020/5/14 22:00 | 01h 58m 01.29s,+65d 43m 00.5s | 17.9 | 01h 58m 00.96s,+65d 42m 59.8s | 18   | FRB position |
| 2020/5/19 23:04 | 01h 58m 01.38s,+65d 42m 58.8s | 18.7 | 01h 58m 01.51s,+65d 42m 59.9s | 18.7 | FRB position |
| 2020/4/24 18:43 | 01h 58m 00.84s,+65d 42m 56.1s | 18.2 | 01h 58m 00.37s,+65d 42m 56.4s | 17.9 | FRB position |
| 2020/4/25 19:34 | 01h 58m 00.57s,+65d 42m 58.0s | 17.1 | 01h 58m 00.66s,+65d 42m 57.5s | 17.8 | FRB position |
| 2020/4/24 20:27 | 01h 58m 01.16s,+65d 43m 01.6s | 18.6 | 01h 58m 01.11s,+65d 43m 00.4s | 18   | FRB position |
| 2020/4/26 20:25 | 01h 58m 00.68s,+65d 42m 57.6s | 17.8 | 01h 58m 00.30s,+65d 42m 56.8s | 18.6 | FRB position |
| 2020/5/15 23:27 | 01h 58m 01.20s,+65d 43m 02.9s | 17.3 | 01h 58m 01.13s,+65d 43m 01.8s | 17.4 | FRB position |
| 2020/4/26 19:09 | 01h 58m 00.45s,+65d 42m 59.0s | 18.2 | 01h 58m 00.04s,+65d 43m 00.0s | 18.1 | FRB position |
| 2020/4/24 19:12 | 01h 58m 01.36s,+65d 43m 02.0s | 18.5 | 01h 58m 01.22s,+65d 43m 02.2s | 18.1 | FRB position |
| 2020/4/24 20:35 | 01h 58m 00.86s,+65d 43m 04.0s | 18.4 | 01h 58m 00.88s,+65d 43m 02.5s | 18   | FRB position |

|                 |                               |      |                               |      |              |
|-----------------|-------------------------------|------|-------------------------------|------|--------------|
| 2020/4/26 20:05 | 01h 58m 00.86s,+65d 43m 00.4s | 18.4 | 01h 58m 01.07s,+65d 43m 00.7s | 18.5 | FRB position |
| 2020/5/19 21:33 | 01h 58m 00.45s,+65d 42m 59.6s | 18.1 | 01h 58m 00.74s,+65d 42m 58.1s | 18.4 | FRB position |
| 2020/5/20 0:09  | 01h 58m 01.01s,+65d 42m 57.0s | 18.4 | 01h 58m 01.31s,+65d 42m 57.0s | 18.5 | FRB position |
| 2020/5/17 22:35 | 01h 58m 01.16s,+65d 43m 02.1s | 18.2 | 01h 58m 00.87s,+65d 43m 03.3s | 18.5 | FRB position |
| 2020/4/25 20:26 | 01h 58m 00.21s,+65d 43m 00.8s | 17.6 | 01h 58m 00.47s,+65d 43m 01.0s | 18.1 | FRB position |
| 2020/4/25 18:35 | 01h 58m 01.09s,+65d 43m 00.8s | 18.5 | 01h 58m 00.71s,+65d 42m 59.7s | 18.5 | FRB position |
| 2020/5/19 23:50 | 01h 58m 01.14s,+65d 42m 57.2s | 18.4 | 01h 58m 00.99s,+65d 42m 56.4s | 18.1 | FRB position |
| 2020/5/19 22:28 | 01h 58m 00.56s,+65d 42m 57.7s | 18.7 | 01h 58m 00.25s,+65d 42m 59.3s | 18.5 | FRB position |
| 2020/5/19 22:51 | 01h 58m 01.35s,+65d 43m 01.3s | 18.7 | 01h 58m 01.30s,+65d 43m 01.3s | 18.8 | FRB position |
| 2020/4/26 19:23 | 01h 58m 00.96s,+65d 42m 59.6s | 17.8 | 01h 58m 01.03s,+65d 42m 57.6s | 18   | FRB position |
| 2020/4/26 20:17 | 01h 58m 00.98s,+65d 43m 01.7s | 18.5 | 01h 58m 01.33s,+65d 43m 00.3s | 17.6 | FRB position |
| 2020/5/14 20:00 | 01h 58m 00.66s,+65d 43m 05.1s | 17.8 | 01h 58m 00.79s,+65d 43m 04.5s | 17.6 | FRB position |
| 2020/5/14 20:28 | 01h 58m 01.28s,+65d 42m 57.5s | 16.6 | 01h 58m 01.18s,+65d 42m 57.4s | 17   | FRB position |
| 2020/5/19 23:49 | 01h 58m 01.21s,+65d 43m 00.3s | 18.3 | 01h 58m 01.54s,+65d 42m 59.8s | 18.6 | FRB position |
| 2020/4/25 17:55 | 01h 58m 00.66s,+65d 43m 00.8s | 18.4 | 01h 58m 00.55s,+65d 42m 58.4s | 17.4 | FRB position |
| 2020/4/25 19:19 | 01h 58m 00.73s,+65d 42m 58.8s | 18   | 01h 58m 00.34s,+65d 42m 59.9s | 17.8 | FRB position |
| 2020/5/15 22:56 | 01h 58m 01.08s,+65d 42m 59.3s | 17.7 | 01h 58m 01.18s,+65d 42m 57.8s | 17.7 | FRB position |
| 2020/4/26 20:04 | 01h 58m 00.83s,+65d 43m 04.5s | 17.7 | 01h 58m 00.95s,+65d 43m 04.2s | 18.2 | FRB position |
| 2020/4/26 20:16 | 01h 58m 00.50s,+65d 42m 59.7s | 18.5 | 01h 58m 00.26s,+65d 43m 01.7s | 18.2 | FRB position |
| 2020/5/15 23:56 | 01h 58m 00.19s,+65d 43m 02.0s | 17.6 | 01h 58m 00.35s,+65d 43m 03.1s | 18.3 | FRB position |
| 2020/5/19 21:49 | 01h 58m 00.45s,+65d 42m 58.2s | 17.8 | 01h 58m 00.37s,+65d 43m 00.1s | 18.5 | FRB position |
| 2020/5/14 22:53 | 01h 58m 00.21s,+65d 43m 02.5s | 18.2 | 01h 58m 00.41s,+65d 43m 01.6s | 18.3 | FRB position |
| 2020/4/25 19:38 | 01h 58m 00.24s,+65d 42m 58.7s | 17.4 | 01h 58m 00.46s,+65d 42m 57.2s | 15.7 | FRB position |
| 2020/5/14 23:08 | 01h 58m 00.33s,+65d 42m 59.3s | 17.6 | 01h 58m 00.39s,+65d 42m 56.5s | 17.7 | FRB position |
| 2020/5/14 21:53 | 01h 58m 00.71s,+65d 42m 57.6s | 17   | 01h 58m 00.89s,+65d 42m 57.5s | 18.2 | FRB position |
| 2020/4/24 20:34 | 01h 58m 00.40s,+65d 42m 56.1s | 18.7 | 01h 58m 00.81s,+65d 42m 56.5s | 17.7 | FRB position |
| 2020/5/17 22:18 | 01h 58m 00.63s,+65d 42m 59.5s | 18.1 | 01h 58m 00.85s,+65d 43m 01.0s | 18.2 | FRB position |
| 2020/4/24 20:18 | 01h 58m 00.36s,+65d 43m 04.2s | 17.7 | 01h 58m 00.20s,+65d 43m 02.9s | 18.6 | FRB position |
| 2020/4/26 19:27 | 01h 58m 00.91s,+65d 43m 02.6s | 18.5 | 01h 58m 00.84s,+65d 43m 02.3s | 18.5 | FRB position |
| 2020/5/15 21:00 | 01h 58m 00.13s,+65d 43m 00.2s | 18.3 | 01h 58m 00.36s,+65d 43m 02.0s | 17.9 | FRB position |
| 2020/5/14 22:42 | 01h 58m 00.55s,+65d 43m 00.5s | 17.5 | 01h 58m 00.87s,+65d 43m 00.1s | 17.3 | FRB position |
| 2020/5/15 20:04 | 01h 58m 00.78s,+65d 42m 56.7s | 17.8 | 01h 58m 00.82s,+65d 42m 55.5s | 17.2 | FRB position |
| 2020/5/19 22:21 | 01h 58m 00.90s,+65d 43m 02.3s | 18.6 | 01h 58m 00.75s,+65d 42m 59.6s | 18.1 | FRB position |
| 2020/5/14 20:45 | 01h 58m 00.44s,+65d 42m 56.6s | 17.1 | 01h 58m 00.81s,+65d 42m 58.4s | 17.6 | FRB position |

|                 |                               |      |                               |      |              |
|-----------------|-------------------------------|------|-------------------------------|------|--------------|
| 2020/4/25 20:41 | 01h 58m 00.61s,+65d 42m 57.4s | 17.5 | 01h 58m 00.89s,+65d 42m 55.6s | 18.5 | FRB position |
| 2020/5/19 23:00 | 01h 58m 01.32s,+65d 43m 01.0s | 17.8 | 01h 58m 01.40s,+65d 43m 01.6s | 18.7 | FRB position |
| 2020/5/17 19:14 | 01h 58m 00.20s,+65d 42m 58.5s | 17.7 | 01h 58m 00.32s,+65d 42m 59.2s | 18.4 | FRB position |
| 2020/5/19 23:57 | 01h 58m 00.82s,+65d 42m 58.6s | 18.4 | 01h 58m 01.15s,+65d 42m 56.9s | 18.6 | FRB position |
| 2020/5/19 23:33 | 01h 58m 01.18s,+65d 42m 56.6s | 18.3 | 01h 58m 00.97s,+65d 42m 58.1s | 18.8 | FRB position |
| 2020/5/14 22:41 | 01h 58m 00.86s,+65d 42m 56.8s | 16.8 | 01h 58m 00.86s,+65d 42m 57.8s | 17.5 | FRB position |
| 2020/5/15 21:05 | 01h 58m 00.44s,+65d 43m 01.0s | 18   | 01h 58m 00.28s,+65d 42m 59.7s | 18.3 | FRB position |
| 2020/5/17 18:02 | 01h 58m 00.05s,+65d 43m 00.1s | 17.3 | 01h 58m 00.15s,+65d 43m 02.9s | 17.5 | FRB position |
| 2020/5/19 22:01 | 01h 58m 00.26s,+65d 42m 56.5s | 17.5 | 01h 58m 00.22s,+65d 42m 56.6s | 18.5 | FRB position |
| 2020/4/25 17:16 | 01h 58m 00.66s,+65d 43m 04.5s | 17.7 | 01h 58m 00.53s,+65d 43m 03.4s | 16.9 | FRB position |
| 2020/5/19 21:49 | 01h 58m 00.46s,+65d 42m 58.8s | 18.6 | 01h 58m 00.14s,+65d 43m 00.3s | 18.7 | FRB position |
| 2020/5/15 23:37 | 01h 58m 01.13s,+65d 43m 03.1s | 18.5 | 01h 58m 01.14s,+65d 43m 01.9s | 18.6 | FRB position |
| 2020/4/25 19:37 | 01h 58m 00.59s,+65d 43m 01.5s | 16.7 | 01h 58m 00.34s,+65d 43m 02.4s | 17.5 | FRB position |
| 2020/5/17 18:18 | 01h 58m 00.79s,+65d 43m 03.0s | 17.8 | 01h 58m 01.21s,+65d 43m 02.1s | 16.8 | FRB position |
| 2020/5/19 22:18 | 01h 58m 00.87s,+65d 42m 58.4s | 18.1 | 01h 58m 01.00s,+65d 42m 58.3s | 18.8 | FRB position |
| 2020/5/20 0:02  | 01h 58m 00.74s,+65d 42m 58.4s | 17.7 | 01h 58m 01.05s,+65d 42m 59.3s | 17.6 | FRB position |
| 2020/5/19 23:36 | 01h 58m 00.57s,+65d 43m 02.7s | 18.4 | 01h 58m 00.44s,+65d 43m 01.6s | 17.8 | FRB position |
| 2020/4/6 21:00  | 01h 58m 00.76s,+65d 42m 58.8s | 18.9 | 01h 58m 00.97s,+65d 43m 01.1s | 17.4 | FRB position |
| 2020/4/24 20:27 | 01h 58m 00.72s,+65d 42m 57.0s | 17.7 | 01h 58m 00.94s,+65d 42m 58.6s | 18.6 | FRB position |
| 2020/5/15 22:07 | 01h 58m 00.65s,+65d 43m 04.7s | 17.3 | 01h 58m 00.92s,+65d 43m 02.7s | 18.4 | FRB position |
| 2020/5/19 21:29 | 01h 58m 00.38s,+65d 43m 00.9s | 18.6 | 01h 58m 00.06s,+65d 43m 01.1s | 18   | FRB position |
| 2020/5/19 22:04 | 01h 58m 00.53s,+65d 43m 04.4s | 18   | 01h 58m 00.66s,+65d 43m 01.8s | 18.8 | FRB position |
| 2020/5/20 0:12  | 01h 58m 00.61s,+65d 42m 56.9s | 17.9 | 01h 58m 01.01s,+65d 42m 56.0s | 18.1 | FRB position |
| 2020/4/25 17:41 | 01h 58m 00.86s,+65d 42m 58.6s | 18.4 | 01h 58m 00.41s,+65d 42m 58.6s | 18.4 | FRB position |
| 2020/5/19 21:43 | 01h 58m 00.62s,+65d 42m 56.0s | 18.6 | 01h 58m 00.95s,+65d 42m 57.7s | 18.5 | FRB position |
| 2020/4/26 19:52 | 01h 58m 01.15s,+65d 43m 00.0s | 18.5 | 01h 58m 01.25s,+65d 43m 00.3s | 17.8 | FRB position |
| 2020/5/14 19:05 | 01h 58m 00.24s,+65d 42m 59.1s | 18   | 01h 58m 00.42s,+65d 42m 58.9s | 17.7 | FRB position |
| 2020/4/26 19:07 | 01h 58m 01.06s,+65d 42m 57.9s | 18   | 01h 58m 00.69s,+65d 42m 59.3s | 17.8 | FRB position |
| 2020/4/26 20:08 | 01h 58m 01.42s,+65d 43m 02.4s | 17.9 | 01h 58m 01.33s,+65d 43m 03.4s | 18.2 | FRB position |
| 2020/5/19 20:33 | 01h 58m 00.50s,+65d 43m 01.1s | 18.5 | 01h 58m 00.54s,+65d 42m 58.3s | 17.8 | FRB position |
| 2020/4/25 18:24 | 01h 58m 00.99s,+65d 43m 00.7s | 18.2 | 01h 58m 00.90s,+65d 43m 00.7s | 17.8 | FRB position |
| 2020/5/15 19:48 | 01h 58m 00.95s,+65d 43m 04.2s | 17.1 | 01h 58m 00.66s,+65d 43m 04.8s | 18   | FRB position |
| 2020/5/19 22:23 | 01h 58m 00.89s,+65d 43m 02.9s | 18.3 | 01h 58m 01.27s,+65d 43m 03.4s | 18.7 | FRB position |
| 2020/5/20 0:25  | 01h 58m 01.23s,+65d 42m 59.7s | 17   | 01h 58m 01.48s,+65d 42m 58.7s | 17.3 | FRB position |

|                 |                               |      |                               |      |              |
|-----------------|-------------------------------|------|-------------------------------|------|--------------|
| 2020/5/14 22:17 | 01h 58m 00.35s,+65d 42m 56.8s | 17.7 | 01h 58m 00.37s,+65d 42m 56.9s | 18.2 | FRB position |
| 2020/5/19 22:01 | 01h 58m 00.74s,+65d 42m 58.2s | 18.4 | 01h 58m 00.75s,+65d 42m 56.5s | 18.3 | FRB position |
| 2020/5/15 20:26 | 01h 58m 01.24s,+65d 43m 02.2s | 18   | 01h 58m 01.34s,+65d 42m 59.9s | 17.3 | FRB position |
| 2020/4/26 19:10 | 01h 58m 01.54s,+65d 43m 00.5s | 17.4 | 01h 58m 01.21s,+65d 43m 01.8s | 18.4 | FRB position |
| 2020/4/25 18:56 | 01h 58m 00.51s,+65d 42m 58.4s | 18.5 | 01h 58m 00.86s,+65d 42m 58.3s | 18.3 | FRB position |
| 2020/5/14 22:20 | 01h 58m 00.21s,+65d 43m 01.0s | 18   | 01h 58m 00.52s,+65d 43m 02.2s | 18.2 | FRB position |
| 2020/5/15 22:49 | 01h 58m 00.48s,+65d 42m 59.5s | 17.8 | 01h 58m 00.69s,+65d 42m 59.2s | 18.2 | FRB position |
| 2020/5/17 18:42 | 01h 58m 01.19s,+65d 43m 00.5s | 18   | 01h 58m 01.04s,+65d 42m 58.0s | 18   | FRB position |
| 2020/5/15 18:42 | 01h 58m 00.63s,+65d 43m 02.0s | 17.7 | 01h 58m 00.40s,+65d 43m 02.1s | 18.2 | FRB position |
| 2020/4/25 19:50 | 01h 58m 01.21s,+65d 42m 56.9s | 17.6 | 01h 58m 01.48s,+65d 42m 58.7s | 17.7 | FRB position |
| 2020/5/14 19:48 | 01h 58m 00.57s,+65d 43m 03.8s | 17.9 | 01h 58m 00.51s,+65d 43m 04.6s | 18   | FRB position |
| 2020/4/26 19:15 | 01h 58m 00.59s,+65d 43m 04.5s | 17.8 | 01h 58m 00.42s,+65d 43m 04.7s | 17.1 | FRB position |
| 2020/5/17 19:20 | 01h 58m 00.93s,+65d 42m 59.0s | 16.7 | 01h 58m 01.12s,+65d 42m 59.5s | 17.9 | FRB position |
| 2020/4/24 18:30 | 01h 58m 00.99s,+65d 42m 58.1s | 18.3 | 01h 58m 01.00s,+65d 42m 56.7s | 17.7 | FRB position |
| 2020/5/19 22:51 | 01h 58m 01.28s,+65d 42m 60.0s | 18.1 | 01h 58m 01.25s,+65d 42m 58.3s | 18.8 | FRB position |
| 2020/5/20 0:37  | 01h 58m 00.63s,+65d 43m 03.5s | 16.9 | 01h 58m 00.41s,+65d 43m 02.1s | 17.3 | FRB position |
| 2020/5/14 22:41 | 01h 58m 00.56s,+65d 42m 57.6s | 18.2 | 01h 58m 00.11s,+65d 42m 57.4s | 17.9 | FRB position |
| 2020/5/19 23:49 | 01h 58m 01.34s,+65d 43m 02.2s | 18.1 | 01h 58m 01.30s,+65d 43m 00.7s | 18.7 | FRB position |
| 2020/5/19 22:14 | 01h 58m 00.01s,+65d 42m 59.2s | 18.7 | 01h 58m 00.08s,+65d 43m 01.0s | 18.8 | FRB position |
| 2020/4/6 20:40  | 01h 58m 01.18s,+65d 43m 02.2s | 18.7 | 01h 58m 00.90s,+65d 43m 03.4s | 18.5 | FRB position |
| 2020/4/24 18:26 | 01h 58m 01.15s,+65d 42m 58.9s | 17.8 | 01h 58m 00.96s,+65d 42m 59.2s | 17.9 | FRB position |
| 2020/5/14 22:32 | 01h 58m 00.56s,+65d 43m 01.4s | 17.2 | 01h 58m 00.51s,+65d 43m 00.3s | 17.8 | FRB position |
| 2020/5/19 23:33 | 01h 58m 00.32s,+65d 43m 04.0s | 18.5 | 01h 58m 00.90s,+65d 42m 59.6s | 18.4 | FRB position |
| 2020/5/15 19:19 | 01h 58m 00.75s,+65d 42m 57.3s | 18.2 | 01h 58m 01.04s,+65d 42m 56.8s | 18.1 | FRB position |
| 2020/5/15 22:32 | 01h 58m 00.48s,+65d 43m 01.4s | 18.5 | 01h 58m 00.18s,+65d 42m 59.3s | 18.2 | FRB position |
| 2020/4/6 21:33  | 01h 58m 00.83s,+65d 43m 01.1s | 18.3 | 01h 58m 00.89s,+65d 43m 03.6s | 18.1 | FRB position |
| 2020/4/6 21:29  | 01h 58m 01.15s,+65d 42m 58.4s | 18   | 01h 58m 01.45s,+65d 42m 57.8s | 17.9 | FRB position |
| 2020/5/14 22:17 | 01h 58m 01.05s,+65d 42m 59.2s | 17.5 | 01h 58m 01.20s,+65d 42m 58.0s | 17.9 | FRB position |
| 2020/4/26 18:56 | 01h 58m 00.60s,+65d 43m 00.4s | 17.9 | 01h 58m 00.59s,+65d 42m 60.0s | 18.1 | FRB position |
| 2020/4/24 20:41 | 01h 58m 00.54s,+65d 42m 59.4s | 18.7 | 01h 58m 00.22s,+65d 43m 00.3s | 18.7 | FRB position |
| 2020/4/24 18:08 | 01h 58m 00.04s,+65d 43m 00.0s | 18.7 | 01h 58m 00.10s,+65d 43m 02.1s | 18.7 | FRB position |
| 2020/4/25 20:10 | 01h 58m 01.14s,+65d 42m 57.8s | 17.7 | 01h 58m 01.39s,+65d 43m 00.2s | 18.2 | FRB position |
| 2020/5/20 0:20  | 01h 58m 00.17s,+65d 43m 03.1s | 17.4 | 01h 58m 00.18s,+65d 43m 01.1s | 17.3 | FRB position |
| 2020/4/25 18:56 | 01h 58m 00.49s,+65d 43m 02.2s | 18.3 | 01h 58m 00.58s,+65d 43m 00.6s | 18.5 | FRB position |

|                 |                               |      |                               |      |                  |
|-----------------|-------------------------------|------|-------------------------------|------|------------------|
| 2020/4/25 18:28 | 01h 58m 00.43s,+65d 42m 59.8s | 18.6 | 01h 58m 00.51s,+65d 43m 02.0s | 18.6 | FRB position     |
| 2020/4/25 19:38 | 01h 58m 01.42s,+65d 43m 01.4s | 16.7 | 01h 58m 01.19s,+65d 43m 01.6s | 17.1 | FRB position     |
| 2020/5/15 19:55 | 01h 58m 00.35s,+65d 42m 59.8s | 17.4 | 01h 58m 00.68s,+65d 42m 57.7s | 16.3 | FRB position     |
| 2020/5/15 22:53 | 01h 58m 01.04s,+65d 42m 57.8s | 18   | 01h 58m 01.10s,+65d 42m 60.0s | 17.8 | FRB position     |
| 2020/5/17 22:12 | 01h 58m 00.47s,+65d 42m 58.9s | 18.3 | 01h 58m 00.64s,+65d 42m 56.9s | 18.4 | FRB position     |
| 2020/4/26 18:58 | 01h 58m 00.62s,+65d 42m 58.9s | 17.7 | 01h 58m 00.20s,+65d 42m 59.8s | 17.8 | FRB position     |
| 2020/4/24 18:08 | 01h 58m 01.38s,+65d 42m 58.9s | 18.3 | 01h 58m 01.15s,+65d 42m 56.4s | 18.7 | FRB position     |
| 2020/5/17 17:54 | 01h 58m 13.14s,+65d 46m 24.5s | 17.7 | 01h 58m 13.20s,+65d 46m 23.5s | 18   | Empty position 1 |
| 2020/4/25 17:57 | 01h 58m 13.33s,+65d 46m 24.2s | 18.2 | 01h 58m 13.39s,+65d 46m 23.6s | 18.6 | Empty position 1 |
| 2020/5/14 23:46 | 01h 58m 12.82s,+65d 46m 28.8s | 17.7 | 01h 58m 12.90s,+65d 46m 26.0s | 17.5 | Empty position 1 |
| 2020/5/17 22:31 | 01h 58m 13.01s,+65d 46m 23.9s | 17.8 | 01h 58m 13.24s,+65d 46m 25.3s | 17.1 | Empty position 1 |
| 2020/5/17 22:28 | 01h 58m 13.03s,+65d 46m 27.3s | 17.9 | 01h 58m 12.97s,+65d 46m 26.7s | 17.7 | Empty position 1 |
| 2020/4/25 19:27 | 01h 58m 13.90s,+65d 46m 29.4s | 17.8 | 01h 58m 13.81s,+65d 46m 28.3s | 17.5 | Empty position 1 |
| 2020/5/15 18:33 | 01h 58m 13.00s,+65d 46m 23.5s | 18.1 | 01h 58m 13.41s,+65d 46m 25.0s | 18.2 | Empty position 1 |
| 2020/5/15 20:51 | 01h 58m 13.22s,+65d 46m 25.6s | 18.1 | 01h 58m 13.26s,+65d 46m 27.1s | 18.4 | Empty position 1 |
| 2020/4/25 20:15 | 01h 58m 13.41s,+65d 46m 29.9s | 17.3 | 01h 58m 13.11s,+65d 46m 27.7s | 17.6 | Empty position 1 |
| 2020/5/14 22:25 | 01h 58m 13.44s,+65d 46m 26.9s | 17.7 | 01h 58m 13.43s,+65d 46m 25.9s | 17.5 | Empty position 1 |
| 2020/5/19 23:26 | 01h 58m 12.83s,+65d 46m 30.3s | 18.3 | 01h 58m 12.91s,+65d 46m 30.5s | 18.5 | Empty position 1 |
| 2020/5/14 19:06 | 01h 58m 12.81s,+65d 46m 25.9s | 17.2 | 01h 58m 12.76s,+65d 46m 24.6s | 17.4 | Empty position 1 |
| 2020/5/17 19:07 | 01h 58m 13.31s,+65d 46m 30.5s | 17.8 | 01h 58m 13.65s,+65d 46m 30.3s | 17.7 | Empty position 1 |
| 2020/5/17 18:46 | 01h 58m 13.78s,+65d 46m 28.1s | 18.2 | 01h 58m 13.87s,+65d 46m 28.7s | 18.1 | Empty position 1 |
| 2020/4/24 19:34 | 01h 58m 12.87s,+65d 46m 30.5s | 18.6 | 01h 58m 13.05s,+65d 46m 28.2s | 18.4 | Empty position 1 |
| 2020/5/15 22:57 | 01h 58m 13.48s,+65d 46m 27.5s | 17   | 01h 58m 13.15s,+65d 46m 29.6s | 17.2 | Empty position 1 |
| 2020/5/15 21:28 | 01h 58m 12.90s,+65d 46m 28.6s | 18.4 | 01h 58m 12.74s,+65d 46m 30.6s | 17.7 | Empty position 1 |
| 2020/5/20 0:23  | 01h 58m 13.21s,+65d 46m 29.6s | 17   | 01h 58m 13.23s,+65d 46m 27.7s | 17.9 | Empty position 1 |
| 2020/4/25 19:34 | 01h 58m 13.41s,+65d 46m 26.6s | 18.2 | 01h 58m 13.75s,+65d 46m 26.2s | 17.9 | Empty position 1 |
| 2020/5/19 22:07 | 01h 58m 12.61s,+65d 46m 27.3s | 18.2 | 01h 58m 13.07s,+65d 46m 27.4s | 17.9 | Empty position 1 |
| 2020/5/15 18:22 | 01h 58m 13.71s,+65d 46m 31.8s | 18.2 | 01h 58m 13.35s,+65d 46m 31.7s | 18.2 | Empty position 1 |
| 2020/5/19 23:06 | 01h 58m 13.22s,+65d 46m 27.5s | 18.4 | 01h 58m 13.29s,+65d 46m 25.7s | 17.8 | Empty position 1 |
| 2020/5/14 23:38 | 01h 58m 13.47s,+65d 46m 24.2s | 17   | 01h 58m 13.32s,+65d 46m 25.2s | 18.2 | Empty position 1 |
| 2020/5/19 22:44 | 01h 58m 13.11s,+65d 46m 29.8s | 18.7 | 01h 58m 13.03s,+65d 46m 29.1s | 18.7 | Empty position 1 |
| 2020/5/14 18:45 | 01h 58m 13.97s,+65d 46m 30.9s | 17.6 | 01h 58m 13.88s,+65d 46m 31.1s | 18   | Empty position 1 |
| 2020/5/15 20:54 | 01h 58m 12.71s,+65d 46m 25.2s | 17.9 | 01h 58m 12.85s,+65d 46m 26.0s | 18.2 | Empty position 1 |
| 2020/5/14 20:23 | 01h 58m 13.24s,+65d 46m 27.2s | 16.6 | 01h 58m 13.40s,+65d 46m 27.7s | 17.4 | Empty position 1 |

|                 |                               |      |                               |      |                  |
|-----------------|-------------------------------|------|-------------------------------|------|------------------|
| 2020/5/15 23:26 | 01h 58m 13.10s,+65d 46m 28.0s | 15.8 | 01h 58m 13.03s,+65d 46m 30.1s | 16.2 | Empty position 1 |
| 2020/5/14 23:14 | 01h 58m 13.04s,+65d 46m 25.7s | 18.3 | 01h 58m 13.16s,+65d 46m 26.0s | 17.4 | Empty position 1 |
| 2020/5/15 19:00 | 01h 58m 13.04s,+65d 46m 28.6s | 18.2 | 01h 58m 13.15s,+65d 46m 29.3s | 17.9 | Empty position 1 |
| 2020/5/17 18:35 | 01h 58m 12.77s,+65d 46m 30.0s | 17.8 | 01h 58m 12.69s,+65d 46m 29.0s | 17.5 | Empty position 1 |
| 2020/5/14 23:14 | 01h 58m 13.78s,+65d 46m 30.7s | 18.4 | 01h 58m 13.48s,+65d 46m 31.0s | 17.8 | Empty position 1 |
| 2020/5/17 18:00 | 01h 58m 13.36s,+65d 46m 26.6s | 17.8 | 01h 58m 13.37s,+65d 46m 26.6s | 17.4 | Empty position 1 |
| 2020/5/14 23:22 | 01h 58m 13.43s,+65d 46m 28.4s | 17.6 | 01h 58m 13.74s,+65d 46m 26.1s | 17.5 | Empty position 1 |
| 2020/5/15 21:03 | 01h 58m 13.75s,+65d 46m 25.7s | 18.2 | 01h 58m 13.38s,+65d 46m 27.5s | 17.5 | Empty position 1 |
| 2020/5/20 0:36  | 01h 58m 13.60s,+65d 46m 24.0s | 17.2 | 01h 58m 13.50s,+65d 46m 23.2s | 17.4 | Empty position 1 |
| 2020/5/20 0:31  | 01h 58m 13.19s,+65d 46m 31.2s | 17.6 | 01h 58m 13.50s,+65d 46m 30.0s | 17   | Empty position 1 |
| 2020/4/25 17:55 | 01h 58m 13.24s,+65d 46m 28.6s | 18.3 | 01h 58m 13.53s,+65d 46m 28.1s | 17.9 | Empty position 1 |
| 2020/5/17 21:39 | 01h 58m 13.62s,+65d 46m 30.5s | 17.8 | 01h 58m 13.42s,+65d 46m 29.1s | 17.7 | Empty position 1 |
| 2020/4/24 19:23 | 01h 58m 14.00s,+65d 46m 26.8s | 18.6 | 01h 58m 13.84s,+65d 46m 25.3s | 18.5 | Empty position 1 |
| 2020/5/15 23:30 | 01h 58m 14.06s,+65d 46m 30.2s | 17.9 | 01h 58m 13.86s,+65d 46m 31.3s | 17.9 | Empty position 1 |
| 2020/5/14 18:34 | 01h 58m 13.25s,+65d 46m 25.7s | 17.8 | 01h 58m 12.89s,+65d 46m 25.1s | 18.1 | Empty position 1 |
| 2020/4/25 19:18 | 01h 58m 13.60s,+65d 46m 29.7s | 18.4 | 01h 58m 13.61s,+65d 46m 32.1s | 18   | Empty position 1 |
| 2020/5/19 22:04 | 01h 58m 13.95s,+65d 46m 25.3s | 18.8 | 01h 58m 13.56s,+65d 46m 24.4s | 18.1 | Empty position 1 |
| 2020/4/25 18:51 | 01h 58m 13.61s,+65d 46m 31.2s | 18.6 | 01h 58m 13.32s,+65d 46m 32.0s | 18.1 | Empty position 1 |
| 2020/5/15 19:16 | 01h 58m 13.66s,+65d 46m 27.5s | 17.9 | 01h 58m 13.39s,+65d 46m 26.4s | 17.8 | Empty position 1 |
| 2020/5/17 17:57 | 01h 58m 13.30s,+65d 46m 27.9s | 17.2 | 01h 58m 13.74s,+65d 46m 28.5s | 18.1 | Empty position 1 |
| 2020/4/24 18:46 | 01h 58m 12.94s,+65d 46m 27.3s | 18.6 | 01h 58m 12.88s,+65d 46m 29.3s | 18.7 | Empty position 1 |
| 2020/4/25 20:51 | 01h 58m 12.95s,+65d 46m 27.8s | 18.2 | 01h 58m 12.64s,+65d 46m 25.7s | 18.5 | Empty position 1 |
| 2020/5/15 23:46 | 01h 58m 13.37s,+65d 46m 31.1s | 18.5 | 01h 58m 12.98s,+65d 46m 30.2s | 18.6 | Empty position 1 |
| 2020/5/19 20:45 | 01h 58m 13.14s,+65d 46m 30.5s | 18.6 | 01h 58m 12.71s,+65d 46m 30.1s | 18.1 | Empty position 1 |
| 2020/5/20 0:18  | 01h 58m 13.64s,+65d 46m 27.1s | 18.1 | 01h 58m 13.61s,+65d 46m 29.6s | 18   | Empty position 1 |
| 2020/5/15 18:55 | 01h 58m 12.75s,+65d 46m 25.6s | 18.4 | 01h 58m 12.77s,+65d 46m 26.9s | 18.3 | Empty position 1 |
| 2020/4/25 18:23 | 01h 58m 13.67s,+65d 46m 25.5s | 17.9 | 01h 58m 13.79s,+65d 46m 26.8s | 18   | Empty position 1 |
| 2020/5/17 21:39 | 01h 58m 13.49s,+65d 46m 26.4s | 17.8 | 01h 58m 13.20s,+65d 46m 25.7s | 17.2 | Empty position 1 |
| 2020/5/15 23:32 | 01h 58m 13.47s,+65d 46m 28.4s | 17.4 | 01h 58m 13.15s,+65d 46m 27.7s | 18.4 | Empty position 1 |
| 2020/5/14 23:42 | 01h 58m 13.82s,+65d 46m 28.4s | 18.1 | 01h 58m 13.68s,+65d 46m 28.9s | 18.3 | Empty position 1 |
| 2020/5/17 18:24 | 01h 58m 13.75s,+65d 46m 25.3s | 16.5 | 01h 58m 13.48s,+65d 46m 27.6s | 17.8 | Empty position 1 |
| 2020/4/26 20:35 | 01h 58m 13.40s,+65d 46m 30.7s | 18.3 | 01h 58m 13.31s,+65d 46m 32.3s | 18.1 | Empty position 1 |
| 2020/5/17 21:37 | 01h 58m 13.71s,+65d 46m 31.3s | 17.8 | 01h 58m 13.36s,+65d 46m 31.2s | 17.6 | Empty position 1 |
| 2020/5/17 21:38 | 01h 58m 13.23s,+65d 46m 29.6s | 16.9 | 01h 58m 12.88s,+65d 46m 29.4s | 17.9 | Empty position 1 |

|                 |                               |      |                               |      |                  |
|-----------------|-------------------------------|------|-------------------------------|------|------------------|
| 2020/5/14 23:41 | 01h 58m 13.02s,+65d 46m 27.4s | 18.4 | 01h 58m 13.32s,+65d 46m 28.1s | 17.8 | Empty position 1 |
| 2020/5/14 22:18 | 01h 58m 12.63s,+65d 46m 26.6s | 18.1 | 01h 58m 13.00s,+65d 46m 26.4s | 17.9 | Empty position 1 |
| 2020/5/15 22:04 | 01h 58m 13.27s,+65d 46m 30.0s | 18.1 | 01h 58m 13.47s,+65d 46m 31.5s | 17.8 | Empty position 1 |
| 2020/5/14 22:56 | 01h 58m 13.10s,+65d 46m 25.8s | 18   | 01h 58m 13.08s,+65d 46m 27.0s | 17.7 | Empty position 1 |
| 2020/4/24 19:02 | 01h 58m 13.28s,+65d 46m 24.7s | 18.6 | 01h 58m 13.70s,+65d 46m 24.4s | 18.5 | Empty position 1 |
| 2020/5/14 17:51 | 01h 58m 13.62s,+65d 46m 25.3s | 16.9 | 01h 58m 13.28s,+65d 46m 25.3s | 17.4 | Empty position 1 |
| 2020/5/14 17:49 | 01h 58m 13.71s,+65d 46m 27.3s | 16.9 | 01h 58m 13.33s,+65d 46m 27.4s | 16.8 | Empty position 1 |
| 2020/5/20 0:16  | 01h 58m 13.29s,+65d 46m 28.3s | 18   | 01h 58m 13.25s,+65d 46m 26.0s | 17.4 | Empty position 1 |
| 2020/4/26 18:48 | 01h 58m 12.85s,+65d 46m 31.6s | 18   | 01h 58m 12.99s,+65d 46m 31.9s | 17.4 | Empty position 1 |
| 2020/5/14 23:50 | 01h 58m 13.43s,+65d 46m 25.1s | 18.1 | 01h 58m 13.46s,+65d 46m 27.9s | 17.8 | Empty position 1 |
| 2020/5/14 19:08 | 01h 58m 13.34s,+65d 46m 25.9s | 16.8 | 01h 58m 13.16s,+65d 46m 23.5s | 16.9 | Empty position 1 |
| 2020/5/14 20:48 | 01h 58m 13.80s,+65d 46m 30.0s | 17.6 | 01h 58m 13.37s,+65d 46m 29.0s | 17.8 | Empty position 1 |
| 2020/5/15 22:08 | 01h 58m 13.16s,+65d 46m 26.6s | 17.8 | 01h 58m 13.48s,+65d 46m 26.4s | 18.6 | Empty position 1 |
| 2020/5/19 21:51 | 01h 58m 13.42s,+65d 46m 30.0s | 18.5 | 01h 58m 13.50s,+65d 46m 32.4s | 18   | Empty position 1 |
| 2020/5/14 19:29 | 01h 58m 13.51s,+65d 46m 31.5s | 17.9 | 01h 58m 13.67s,+65d 46m 31.1s | 18   | Empty position 1 |
| 2020/4/25 20:10 | 01h 58m 13.47s,+65d 46m 26.4s | 17.7 | 01h 58m 13.20s,+65d 46m 27.9s | 17.8 | Empty position 1 |
| 2020/5/19 23:05 | 01h 58m 13.65s,+65d 46m 23.7s | 18.6 | 01h 58m 13.67s,+65d 46m 23.4s | 18.7 | Empty position 1 |
| 2020/5/17 18:21 | 01h 58m 13.68s,+65d 46m 28.2s | 17.7 | 01h 58m 13.61s,+65d 46m 29.9s | 17.9 | Empty position 1 |
| 2020/5/19 21:17 | 01h 58m 13.38s,+65d 46m 29.6s | 18.2 | 01h 58m 13.36s,+65d 46m 31.8s | 18.4 | Empty position 1 |
| 2020/4/24 18:06 | 01h 58m 13.46s,+65d 46m 27.5s | 18.6 | 01h 58m 13.45s,+65d 46m 27.0s | 18.7 | Empty position 1 |
| 2020/5/19 23:30 | 01h 58m 13.52s,+65d 46m 26.5s | 17.8 | 01h 58m 13.17s,+65d 46m 24.8s | 18.5 | Empty position 1 |
| 2020/5/14 22:05 | 01h 58m 13.46s,+65d 46m 26.8s | 18.1 | 01h 58m 13.28s,+65d 46m 24.2s | 18.1 | Empty position 1 |
| 2020/5/15 22:53 | 01h 58m 13.34s,+65d 46m 28.0s | 17.4 | 01h 58m 13.38s,+65d 46m 30.1s | 17.9 | Empty position 1 |
| 2020/5/14 23:44 | 01h 58m 13.71s,+65d 46m 26.9s | 18   | 01h 58m 13.76s,+65d 46m 25.7s | 18.2 | Empty position 1 |
| 2020/4/25 19:36 | 01h 57m 57.60s,+65d 43m 51.5s | 16.9 | 01h 57m 57.54s,+65d 43m 48.9s | 17.3 | Empty position 2 |
| 2020/5/15 22:44 | 01h 57m 57.30s,+65d 43m 53.1s | 18.4 | 01h 57m 57.28s,+65d 43m 52.9s | 18.2 | Empty position 2 |
| 2020/5/14 18:59 | 01h 57m 57.62s,+65d 43m 46.1s | 17.9 | 01h 57m 57.72s,+65d 43m 48.0s | 18.3 | Empty position 2 |
| 2020/5/14 22:33 | 01h 57m 57.33s,+65d 43m 48.4s | 18.2 | 01h 57m 57.16s,+65d 43m 50.7s | 17.4 | Empty position 2 |
| 2020/4/24 19:05 | 01h 57m 57.36s,+65d 43m 49.7s | 18.6 | 01h 57m 57.35s,+65d 43m 51.1s | 18.7 | Empty position 2 |
| 2020/5/17 18:56 | 01h 57m 56.57s,+65d 43m 50.1s | 18   | 01h 57m 56.84s,+65d 43m 50.6s | 18.3 | Empty position 2 |
| 2020/5/19 21:51 | 01h 57m 57.18s,+65d 43m 50.7s | 17.8 | 01h 57m 57.62s,+65d 43m 49.6s | 18.1 | Empty position 2 |
| 2020/4/25 18:24 | 01h 57m 57.64s,+65d 43m 49.3s | 18   | 01h 57m 57.54s,+65d 43m 50.0s | 18   | Empty position 2 |
| 2020/5/19 20:45 | 01h 57m 57.95s,+65d 43m 48.3s | 18.5 | 01h 57m 57.73s,+65d 43m 46.2s | 18.6 | Empty position 2 |
| 2020/5/15 23:35 | 01h 57m 57.56s,+65d 43m 47.6s | 18.4 | 01h 57m 57.66s,+65d 43m 49.0s | 18.4 | Empty position 2 |



|                 |                               |      |                               |      |                  |
|-----------------|-------------------------------|------|-------------------------------|------|------------------|
| 2020/5/15 20:17 | 01h 57m 56.60s,+65d 43m 48.3s | 17.5 | 01h 57m 56.68s,+65d 43m 51.1s | 18   | Empty position 2 |
| 2020/5/14 19:47 | 01h 57m 56.69s,+65d 43m 48.3s | 17.5 | 01h 57m 56.91s,+65d 43m 46.8s | 17.2 | Empty position 2 |
| 2020/4/26 19:20 | 01h 57m 57.39s,+65d 43m 45.1s | 18   | 01h 57m 57.05s,+65d 43m 47.1s | 18.5 | Empty position 2 |
| 2020/5/14 17:57 | 01h 57m 57.07s,+65d 43m 53.5s | 17.5 | 01h 57m 57.30s,+65d 43m 51.0s | 17.4 | Empty position 2 |
| 2020/5/14 19:37 | 01h 57m 57.36s,+65d 43m 48.5s | 17.5 | 01h 57m 57.41s,+65d 43m 46.9s | 17.8 | Empty position 2 |
| 2020/5/14 22:31 | 01h 57m 56.87s,+65d 43m 46.1s | 17.9 | 01h 57m 57.26s,+65d 43m 46.8s | 17.9 | Empty position 2 |
| 2020/5/14 23:44 | 01h 57m 57.53s,+65d 43m 52.6s | 17   | 01h 57m 57.31s,+65d 43m 52.2s | 17.6 | Empty position 2 |
| 2020/5/19 22:53 | 01h 57m 56.96s,+65d 43m 45.0s | 18.2 | 01h 57m 57.28s,+65d 43m 45.9s | 18.8 | Empty position 2 |
| 2020/5/15 22:48 | 01h 57m 57.52s,+65d 43m 46.3s | 18.2 | 01h 57m 57.43s,+65d 43m 46.0s | 17   | Empty position 2 |
| 2020/4/24 20:31 | 01h 57m 57.73s,+65d 43m 51.4s | 17.5 | 01h 57m 57.78s,+65d 43m 50.8s | 17.7 | Empty position 2 |
| 2020/5/17 17:53 | 01h 57m 57.48s,+65d 43m 53.1s | 17.6 | 01h 57m 57.09s,+65d 43m 51.6s | 18.1 | Empty position 2 |
| 2020/5/14 23:15 | 01h 57m 56.86s,+65d 43m 47.3s | 17.8 | 01h 57m 56.84s,+65d 43m 45.5s | 17.5 | Empty position 2 |
| 2020/4/25 18:59 | 01h 57m 57.75s,+65d 43m 47.5s | 18.2 | 01h 57m 57.71s,+65d 43m 46.0s | 18.1 | Empty position 2 |
| 2020/4/24 19:47 | 01h 57m 56.79s,+65d 43m 49.6s | 18.7 | 01h 57m 56.48s,+65d 43m 49.3s | 17.9 | Empty position 2 |
| 2020/5/14 20:22 | 01h 57m 57.13s,+65d 43m 52.4s | 17.3 | 01h 57m 56.86s,+65d 43m 52.6s | 17.7 | Empty position 2 |
| 2020/4/24 19:44 | 01h 57m 56.79s,+65d 43m 46.4s | 18.1 | 01h 57m 57.11s,+65d 43m 45.1s | 17.8 | Empty position 2 |
| 2020/4/25 20:30 | 01h 57m 57.64s,+65d 43m 49.6s | 18.4 | 01h 57m 57.25s,+65d 43m 49.6s | 18.1 | Empty position 2 |
| 2020/5/17 21:38 | 01h 57m 57.68s,+65d 43m 52.0s | 17.5 | 01h 57m 57.29s,+65d 43m 52.4s | 17   | Empty position 2 |
| 2020/5/20 0:15  | 01h 57m 57.63s,+65d 43m 47.5s | 17.5 | 01h 57m 57.86s,+65d 43m 50.0s | 17.9 | Empty position 2 |
| 2020/4/26 18:52 | 01h 57m 57.30s,+65d 43m 45.9s | 18.2 | 01h 57m 56.88s,+65d 43m 45.4s | 18.4 | Empty position 2 |
| 2020/4/25 19:19 | 01h 57m 57.85s,+65d 43m 48.5s | 18.2 | 01h 57m 58.02s,+65d 43m 49.2s | 17.8 | Empty position 2 |
| 2020/5/19 21:28 | 01h 57m 57.13s,+65d 43m 51.2s | 18.3 | 01h 57m 56.98s,+65d 43m 52.4s | 18.6 | Empty position 2 |
| 2020/4/24 17:57 | 01h 57m 56.97s,+65d 43m 50.3s | 18.6 | 01h 57m 56.73s,+65d 43m 49.3s | 18.4 | Empty position 2 |
| 2020/4/25 19:39 | 01h 57m 57.34s,+65d 43m 50.6s | 16.4 | 01h 57m 57.54s,+65d 43m 52.2s | 17.7 | Empty position 2 |
| 2020/5/14 23:00 | 01h 57m 57.32s,+65d 43m 52.7s | 18.2 | 01h 57m 57.11s,+65d 43m 51.2s | 17.5 | Empty position 2 |
| 2020/5/15 21:35 | 01h 57m 57.43s,+65d 43m 51.9s | 18.3 | 01h 57m 57.24s,+65d 43m 51.8s | 18.5 | Empty position 2 |
| 2020/5/19 22:20 | 01h 57m 56.85s,+65d 43m 51.5s | 17.3 | 01h 57m 57.16s,+65d 43m 50.0s | 18.8 | Empty position 2 |
| 2020/5/17 22:07 | 01h 57m 56.73s,+65d 43m 50.8s | 18.1 | 01h 57m 57.10s,+65d 43m 52.5s | 18   | Empty position 2 |
| 2020/5/15 23:30 | 01h 57m 57.01s,+65d 43m 51.1s | 18.3 | 01h 57m 56.93s,+65d 43m 51.9s | 18.2 | Empty position 2 |
| 2020/5/19 21:47 | 01h 57m 57.17s,+65d 43m 53.5s | 18.7 | 01h 57m 57.35s,+65d 43m 54.1s | 17.9 | Empty position 2 |
| 2020/4/25 19:50 | 01h 57m 56.98s,+65d 43m 52.8s | 17.7 | 01h 57m 57.01s,+65d 43m 52.7s | 17.3 | Empty position 2 |
| 2020/5/14 21:54 | 01h 57m 57.40s,+65d 43m 48.5s | 17.2 | 01h 57m 57.04s,+65d 43m 50.4s | 17.1 | Empty position 2 |
| 2020/5/14 19:29 | 01h 57m 57.38s,+65d 43m 46.0s | 17.1 | 01h 57m 57.84s,+65d 43m 46.8s | 17.7 | Empty position 2 |
| 2020/4/25 18:08 | 01h 57m 56.80s,+65d 43m 49.5s | 18.5 | 01h 57m 57.02s,+65d 43m 49.2s | 18.5 | Empty position 2 |

|                 |                               |      |                               |      |                  |
|-----------------|-------------------------------|------|-------------------------------|------|------------------|
| 2020/5/19 22:40 | 01h 57m 56.97s,+65d 43m 50.8s | 18.7 | 01h 57m 57.29s,+65d 43m 52.3s | 18.3 | Empty position 2 |
| 2020/5/15 19:51 | 01h 57m 56.86s,+65d 43m 48.3s | 17.5 | 01h 57m 56.64s,+65d 43m 45.7s | 16.8 | Empty position 2 |
| 2020/5/15 19:42 | 01h 57m 56.92s,+65d 43m 53.1s | 17.7 | 01h 57m 56.72s,+65d 43m 52.5s | 18.3 | Empty position 2 |
| 2020/4/26 20:40 | 01h 57m 57.04s,+65d 43m 49.4s | 18.5 | 01h 57m 57.37s,+65d 43m 47.5s | 18.3 | Empty position 2 |
| 2020/5/15 19:47 | 01h 57m 57.53s,+65d 43m 51.8s | 17.5 | 01h 57m 57.37s,+65d 43m 49.2s | 17.6 | Empty position 2 |
| 2020/5/17 22:04 | 01h 57m 56.78s,+65d 43m 51.7s | 16.9 | 01h 57m 56.75s,+65d 43m 48.9s | 17.4 | Empty position 2 |
| 2020/5/19 21:04 | 01h 57m 57.78s,+65d 43m 50.5s | 18.4 | 01h 57m 57.57s,+65d 43m 48.5s | 18.1 | Empty position 2 |
| 2020/5/15 19:36 | 01h 57m 57.84s,+65d 43m 49.5s | 17.9 | 01h 57m 57.83s,+65d 43m 51.1s | 18   | Empty position 2 |
| 2020/5/15 22:09 | 01h 57m 57.58s,+65d 43m 47.2s | 18.1 | 01h 57m 57.40s,+65d 43m 45.9s | 18.3 | Empty position 2 |
| 2020/4/25 20:14 | 01h 57m 57.70s,+65d 43m 52.0s | 17.2 | 01h 57m 57.28s,+65d 43m 51.6s | 17.1 | Empty position 2 |
| 2020/5/20 0:23  | 01h 57m 57.28s,+65d 43m 49.5s | 18   | 01h 57m 57.36s,+65d 43m 48.6s | 18   | Empty position 2 |
| 2020/5/14 22:48 | 01h 57m 57.40s,+65d 43m 49.1s | 18.2 | 01h 57m 57.34s,+65d 43m 46.4s | 18   | Empty position 2 |
| 2020/5/14 20:33 | 01h 57m 56.55s,+65d 43m 48.6s | 17.2 | 01h 57m 56.71s,+65d 43m 49.7s | 16.6 | Empty position 2 |
| 2020/5/19 22:31 | 01h 57m 56.60s,+65d 43m 47.8s | 18.7 | 01h 57m 56.85s,+65d 43m 48.1s | 18.6 | Empty position 2 |
| 2020/4/6 21:31  | 01h 57m 57.50s,+65d 43m 50.6s | 18.9 | 01h 57m 57.89s,+65d 43m 49.5s | 18.7 | Empty position 2 |
| 2020/4/25 19:45 | 01h 57m 56.71s,+65d 43m 51.2s | 17.7 | 01h 57m 56.85s,+65d 43m 50.4s | 18   | Empty position 2 |
| 2020/5/17 19:12 | 01h 57m 56.95s,+65d 43m 51.2s | 18.2 | 01h 57m 56.96s,+65d 43m 49.8s | 18.3 | Empty position 2 |
| 2020/4/25 17:16 | 01h 57m 57.11s,+65d 43m 47.7s | 16.5 | 01h 57m 57.44s,+65d 43m 48.6s | 17.6 | Empty position 2 |
| 2020/5/17 18:59 | 01h 57m 57.48s,+65d 43m 45.8s | 18.4 | 01h 57m 57.56s,+65d 43m 47.3s | 18.5 | Empty position 2 |
| 2020/4/25 17:50 | 01h 57m 57.35s,+65d 43m 50.8s | 18.5 | 01h 57m 57.47s,+65d 43m 50.8s | 18.6 | Empty position 2 |
| 2020/4/26 18:54 | 01h 57m 57.67s,+65d 43m 46.2s | 18.4 | 01h 57m 57.70s,+65d 43m 46.6s | 17.7 | Empty position 2 |
| 2020/4/26 18:59 | 01h 57m 57.36s,+65d 43m 48.5s | 18   | 01h 57m 57.64s,+65d 43m 47.4s | 18.4 | Empty position 2 |
| 2020/5/19 22:58 | 01h 57m 57.70s,+65d 43m 50.5s | 18.5 | 01h 57m 58.01s,+65d 43m 48.8s | 18.4 | Empty position 2 |
| 2020/4/25 17:43 | 01h 57m 57.20s,+65d 43m 52.6s | 17.8 | 01h 57m 57.13s,+65d 43m 51.9s | 18.6 | Empty position 2 |
| 2020/4/26 19:19 | 01h 57m 57.19s,+65d 43m 45.6s | 18.3 | 01h 57m 57.39s,+65d 43m 47.5s | 18.4 | Empty position 2 |
| 2020/5/17 18:26 | 01h 57m 57.94s,+65d 43m 48.4s | 17.7 | 01h 57m 57.84s,+65d 43m 46.8s | 17.7 | Empty position 2 |
| 2020/5/17 18:43 | 01h 57m 56.90s,+65d 43m 50.3s | 17.9 | 01h 57m 56.76s,+65d 43m 50.3s | 17.9 | Empty position 2 |
| 2020/5/14 19:55 | 01h 57m 57.06s,+65d 43m 51.9s | 17.6 | 01h 57m 57.23s,+65d 43m 51.9s | 17.9 | Empty position 2 |
| 2020/5/17 18:00 | 01h 57m 56.46s,+65d 43m 51.0s | 18   | 01h 57m 56.60s,+65d 43m 52.1s | 18   | Empty position 2 |
| 2020/5/14 17:54 | 01h 57m 56.80s,+65d 43m 48.1s | 17.8 | 01h 57m 56.74s,+65d 43m 49.5s | 16.4 | Empty position 2 |
| 2020/4/25 19:52 | 01h 57m 56.85s,+65d 43m 48.2s | 17.8 | 01h 57m 56.95s,+65d 43m 48.1s | 18.4 | Empty position 2 |
| 2020/5/14 22:11 | 01h 57m 57.50s,+65d 43m 46.8s | 17.8 | 01h 57m 57.47s,+65d 43m 45.3s | 17.7 | Empty position 2 |
| 2020/5/17 18:14 | 01h 57m 57.77s,+65d 43m 48.6s | 18   | 01h 57m 57.58s,+65d 43m 47.5s | 17.5 | Empty position 2 |
| 2020/5/14 21:22 | 01h 57m 57.26s,+65d 43m 54.2s | 16.8 | 01h 57m 57.62s,+65d 43m 53.2s | 16.6 | Empty position 2 |

|                 |                               |      |                               |      |                  |
|-----------------|-------------------------------|------|-------------------------------|------|------------------|
| 2020/5/15 19:57 | 01h 57m 57.89s,+65d 43m 47.2s | 18   | 01h 57m 57.63s,+65d 43m 48.2s | 18.5 | Empty position 2 |
| 2020/5/17 18:03 | 01h 57m 57.19s,+65d 43m 48.4s | 17.4 | 01h 57m 57.26s,+65d 43m 49.3s | 18   | Empty position 2 |
| 2020/5/19 21:35 | 01h 57m 56.98s,+65d 43m 48.7s | 18.3 | 01h 57m 56.96s,+65d 43m 51.6s | 18.3 | Empty position 2 |
| 2020/4/25 17:37 | 01h 57m 57.06s,+65d 43m 49.1s | 17.8 | 01h 57m 57.20s,+65d 43m 47.2s | 17.6 | Empty position 2 |
| 2020/4/26 19:07 | 01h 57m 56.84s,+65d 43m 49.3s | 18.3 | 01h 57m 56.58s,+65d 43m 49.7s | 18.6 | Empty position 2 |
| 2020/5/14 20:17 | 01h 57m 57.49s,+65d 43m 50.2s | 17.5 | 01h 57m 57.69s,+65d 43m 52.5s | 17.5 | Empty position 2 |
| 2020/4/24 18:14 | 01h 57m 56.80s,+65d 43m 47.7s | 18.7 | 01h 57m 57.03s,+65d 43m 47.4s | 18   | Empty position 2 |
| 2020/4/24 20:40 | 01h 57m 57.29s,+65d 43m 47.8s | 18.6 | 01h 57m 57.32s,+65d 43m 50.0s | 18.7 | Empty position 2 |
| 2020/4/24 20:16 | 01h 57m 57.88s,+65d 43m 47.7s | 17.4 | 01h 57m 57.93s,+65d 43m 49.1s | 18.6 | Empty position 2 |
| 2020/5/17 18:46 | 01h 57m 56.96s,+65d 43m 48.5s | 18.3 | 01h 57m 56.83s,+65d 43m 47.6s | 18.1 | Empty position 2 |
| 2020/5/17 18:09 | 01h 57m 56.53s,+65d 43m 50.7s | 17.8 | 01h 57m 56.78s,+65d 43m 49.9s | 18.1 | Empty position 2 |
| 2020/5/15 21:35 | 01h 57m 57.26s,+65d 43m 45.4s | 18.2 | 01h 57m 57.32s,+65d 43m 44.9s | 17.8 | Empty position 2 |
| 2020/5/17 22:15 | 01h 57m 57.74s,+65d 43m 52.8s | 17.9 | 01h 57m 57.62s,+65d 43m 51.3s | 18.4 | Empty position 2 |
| 2020/4/26 19:42 | 01h 57m 57.03s,+65d 43m 46.8s | 18.4 | 01h 57m 57.00s,+65d 43m 45.7s | 17.8 | Empty position 2 |
| 2020/4/25 17:37 | 01h 57m 56.70s,+65d 43m 50.9s | 18.3 | 01h 57m 56.97s,+65d 43m 53.2s | 18.3 | Empty position 2 |
| 2020/5/19 21:11 | 01h 57m 57.78s,+65d 43m 47.6s | 18.1 | 01h 57m 57.69s,+65d 43m 49.4s | 18.3 | Empty position 2 |

**Table S2.** The photometry of the galactic star formation region from Gemini fit around FRB180916.J0158+65.

| Radius, arcsec | mag   | mag/sq. arcsec |
|----------------|-------|----------------|
| 0.32           | 26.50 | 25.30          |
| 0.48           | 26.23 | 25.91          |
| 0.65           | 25.55 | 25.85          |
| 0.81           | 25.28 | 26.06          |
| 0.97           | 25.04 | 26.22          |
| 1.13           | 24.62 | 26.13          |
| 1.30           | 24.24 | 26.05          |
| 1.46           | 23.87 | 25.93          |
| 1.62           | 23.57 | 25.86          |
| 1.78           | 23.32 | 25.82          |
| 1.94           | 23.09 | 25.77          |
| 2.11           | 23.05 | 25.91          |
| 2.27           | 22.97 | 25.99          |
| 2.43           | 22.77 | 25.94          |
| 2.59           | 22.80 | 26.11          |
| 2.75           | 22.77 | 26.21          |
| 2.92           | 22.61 | 26.18          |
| 3.08           | 22.39 | 26.07          |
| 3.24           | 22.30 | 26.10          |

**Table S3.** Bright events SGR/FRB200428.J1935+2154 simultaneously observed by telescopes of the MASTER Global Network in April 2020. Fermi/GBM observations are from Lin et al.2020 [100]. HXMT Insight data are from Li et al. 2020 [10]. Fast observation data were taken from Zhang et al.2020 [90].  $m_{up}$ – upper limit on optical magnitude;  $F_{up}$ – upper limit on optical fluence, in units of  $10^{-9}$  erg/cm<sup>2</sup>; Range – range of X-ray or radio observations, in units of keV and MHz correspondingly; X-ray – fluence of x-ray flares, in units of  $10^{-7}$  erg/cm<sup>2</sup>; Radio – fluence of a radio burst, in units of  $10^{-19}$  erg/cm<sup>2</sup>.

| MASTER optical observations simultaneously with X-ray flares |            |             |                  |                  |              |           |                           |
|--------------------------------------------------------------|------------|-------------|------------------|------------------|--------------|-----------|---------------------------|
| Date, UTC                                                    | exposition | MASTER site | $m_{up}$ Mlimit  | $F_{up}$ fluence | Detector     | Range keV | X-ray Fluence, $10^{-7}$  |
| 2020-04-27 21:57:38                                          | 180        | Tavrida     | >17.8            | <1.73            | Fermi/GBM    | 8-200     | 14.88±0.23                |
| 2020-04-27 23:23:47                                          | 180        | Tavrida     | >19.1            | <0.52            | Fermi/GBM    | 8-200     | 1.75±0.11                 |
| 2020-04-28 00:19:27                                          | 180        | SAAO        | >14.2            | <47.6            | Fermi/GBM    | 8-200     | 1.11±0.06                 |
| 2020-04-28 00:22:47                                          | 180        | SAAO        | >16.3            | <6.89            | Fermi/GBM    | 8-200     | 0.69±0.06                 |
| 2020-04-28 00:23:47                                          | 180        | Tavrida     | >19.5            | <0.36            | Fermi/GBM    | 8-200     | 34.74±0.26                |
| 2020-04-28 00:35:44                                          | 180        | SAAO        | >17.6            | <2.08            | Fermi/GBM    | 8-200     | 0.63±0.05                 |
| 2020-04-28 00:39:03                                          | 180        | SAAO        | >17.9            | <1.58            | Fermi/GBM    | 8-200     | 20.33±0.26                |
| 2020-04-28 00:41:33                                          | 180        | SAAO        | >18.1            | <1.31            | Fermi/GBM    | 8-200     | 6.52±0.15                 |
| 2020-04-28 00:42:23                                          | 180        | SAAO        | >18.0            | <1.44            | Fermi/GBM    | 8-200     | 70.8±0.5                  |
| 2020-04-28 00:44:53                                          | 180        | SAAO        | >18.0            | <1.44            | Fermi/GBM    | 8-200     | 61.2±0.5                  |
| 2020-04-28 00:45:43                                          | 180        | SAAO        | >17.9            | <1.58            | Fermi/GBM    | 8-200     | 1.50±0.09                 |
| 2020-04-28 00:48:13                                          | 180        | SAAO        | >18.2            | <1.20            | Fermi/GBM    | 8-200     | 25.6±0.4                  |
| 2020-04-28 00:51:32                                          | 180        | SAAO        | >18.4            | <1.01            | Fermi/GBM    | 8-200     | 2.38±0.11                 |
| 2020-04-28 00:52:23                                          | 180        | SAAO        | >18.4            | <1.01            | Fermi/GBM    | 8-200     | 5.89±0.13                 |
| 2020-04-28 01:03:04                                          | 180        | Tavrida     | >18.0            | <0.91            | Fermi/GBM    | 8-200     | 0.77±0.05                 |
| 2020-04-28 03:46:58                                          | 180        | SAAO        | >19.0            | <0.36            | Fermi/GBM    | 8-200     | 2.00±0.07                 |
| 2020-04-28 04:08:46                                          | 180        | IAC         | >16.0            | <5.73            | Fermi/GBM    | 8-200     | 1.89±0.06                 |
| 2020-04-29 20:45:46                                          | 180        | Kislovodsk  | >18.7            | <0.76            | Fermi/GBM    | 8-200     | 41.6±0.3                  |
| 2020-04-30 17:12:47                                          | 10         | Tunka       | >16.8            | <0.24            | HXMT Insight | 1-200     | 0.32                      |
| MASTER optical observations simultaneously with radio burst  |            |             |                  |                  |              |           |                           |
| Date, UTC                                                    | exposition | MASTER site | $m_{up}$ M_limit | $F_{up}$ fluence | Detector     | Range MHz | Radio Fluence, $10^{-19}$ |
| 2020-04-30 21:42:15                                          | 180        | Tavrida     | >16.8            | <4.35            | FAST         | 790-1710  | 7.5                       |

**Table S4.** Results of aLIGO, LIGO/Virgo O1, O2, O3 alerts and optical observations coverage at MASTER-Amur, -Tunka (Tun), -Kislovodsk(Kis), -Tavrida (Tav), -IAC, -SAAO(SA), -OFA robotic telescopes. The time is in UT.

|    | Name             | Status | Trigger time, UT       | Notice time, UT        | Time of the first frame, UT | MASTER obs.                          | Coverage<br>deg <sup>2</sup> | %    |
|----|------------------|--------|------------------------|------------------------|-----------------------------|--------------------------------------|------------------------------|------|
| O1 | GW150914/G184098 | BBH    | 2015-09-14 09:50:45.45 | 2015-09-16 05:39:43.6  | 2015-09-15 03:24:22         | SA, Kis, IAC, Tun                    | 5200                         | 59.0 |
|    | GW151012/G197392 | BBH    | 2015-10-12 09:54:43.43 | 2016-04-25 15:42:45    | 2015-10-12 18:40:29         | Tun, IAC, SA, Amur, Kis              | 2199                         | 38.8 |
|    | G194575          | NFI    | 2015-10-22 13:33:19.19 | 2015-10-22 13:35:44    | 2015-10-22 13:34:56         | Amur, Tun, IAC, Kis, SA              | 21514                        | 46.1 |
|    | GW151226/G211117 | BBH    | 2015-12-26 03:38:53.53 | 2015-12-26 03:40:00.   | 2015-12-26 04:38:50         | IAC, SA, Amur, Tun, Kis              | 2915                         | 82.4 |
| O2 | GW170104/G268556 | BBH    | 2017-01-04 10:11:59.59 | 2017-01-06 21:21:05.05 | 2017-01-04 15:46:07         | Kis, OFA,<br>SA,Tun,Amur,IAC         | 3421                         | 79.8 |
|    | G270580          | Rej    | 2017-01-20 12:30:59.59 | 2017-02-20 15:50:19.19 | 2017-01-20 12:31:12         | Amur, Tun, SA, OFA,<br>Kis, IAC      | 6292                         | 72.7 |
|    | G274296          | NFI    | 2017-02-17 06:05:53.53 | 2017-02-17 23:05:40.40 | 2017-02-17 08:07:14         | OFA,Tun,IAC,SA                       | 4260                         | 74.7 |
|    | G275404          | NFI    | 2017-02-25 18:30:21.21 | 2017-03-08 22:01:02.02 | 2017-02-25 18:31:28         | SA, OFA, IAC, Amur,<br>Tun           | 15640                        | 58.3 |
|    | G275697          | NFI    | 2017-02-27 18:57:31.31 | 2017-03-07 23:00:38.38 | 2017-02-27 19:00:02         | SA, Tun,OFA,                         | 4626                         | 65.4 |
|    | G277583          | NFI    | 2017-03-13 22:40:09.09 | 2017-03-14 00:17:33.33 | 2017-03-13 23:13:0          | SA, IAC, Tun, Amur, Tav              | 12832                        | 54.5 |
|    | G284239          | NFI    | 2017-05-02 22:26:07.07 | 2017-05-03 14:43:20.20 | 2017-05-02 22:31:17         | Kis, SA, IAC,Tun,<br>Amur,OFA        | 4630                         | 55.2 |
|    | GW170608/G288732 | BBH    | 2017-06-08 02:01:16.16 | 2017-06-08 17:29:10.10 | 2017-06-08 18:05:35         | Kis, Tav, OFA, IAC, SA               | 1142                         | 35.4 |
|    | GW170729         | BBH    | 2017-07-29 18:56:29.29 | 2019-03-14 10:00:57.57 | 2017-07-30 00:23:01         | OFA, IAC, Kis                        | 668                          | 21.0 |
|    | GW170809/G296853 | BBH    | 2017-08-09 08:28:21.21 | 2017-08-09 09:17:33.33 | 2017-08-09 10:00:02         | SA, OFA, IAC, Kis                    | 1781                         | 75.2 |
|    | GW170814/G297595 | BBH    | 2017-08-14 10:30:43.43 | 2017-08-16 13:55:32.32 | 2017-08-14 22:10:06         | SA, IAC, Tun, Kis, OFA,<br>Tav, Amur | 642                          | 77.5 |
|    | GW170817/G298048 | BNS    | 2017-08-17 12:41:04.04 | 2017-08-30 12:21:09.09 | 2017-08-17 17:06:47         | SA, OFA, IAC, Kis, Tun,<br>Amur      | 89                           | 58.1 |

|    |                  |      |                        |                        |                     |                                                                     |        |      |
|----|------------------|------|------------------------|------------------------|---------------------|---------------------------------------------------------------------|--------|------|
| O3 | GW170818         | BBH  | 2017-08-18 02:25:09.09 | 2019-03-14 10:04:56.56 | 2017-08-18 05:42:31 | IAC,Kis,OAFa,SA                                                     | 668    | 41.0 |
|    | G298389          | NFI  | 2017-08-19 15:50:46.46 | 2017-08-19 19:06:40.40 | 2017-08-20 10:16:10 | OAFa, SA                                                            | 63     | 1.7  |
|    | GW170823/G298936 | BBH  | 2017-08-23 13:13:58.58 | 2017-08-29 17:21:36.36 | 2017-08-23 16:03:27 | Amur,Tun,Tav,IAC,<br>Kis,SA,OAFa                                    | 1910   | 59.4 |
|    | G299232          | NFI  | 2017-08-25 13:13:37.37 | 2017-08-29 16:08:46.46 | 2017-08-25 17:25:32 | Amur,Tun, Tav,SA, Kis,<br>IAC, OAFa                                 | 4124   | 82.2 |
|    | S190408an        | BBH  | 2019-04-08 18:18:02    | 2019-04-08 22:06:44    | 2019-04-08 18:21:24 | Amur,<br>Tunka,<br>Kislovodsk,<br>Tavrida,<br>SAAO,<br>IAC,<br>OAFa | 1283.7 | 81.9 |
|    | S190412m         | BBH  | 2019-04-12 05:30:44    | 2019-04-12 06:40:50    | 2019-04-12 06:34:43 |                                                                     | 506.6  | 85.3 |
|    | S190421ar        | BBh  | 2019-04-21 21:38:56    | 2019-04-22 17:06:12    | 2019-04-21 21:40:22 |                                                                     | 2557.1 | 55.1 |
|    | S190425z         | BNS  | 2019-04-25 08:18:05    | 2019-04-25 09:06:43    | 2019-04-25 09:10:18 |                                                                     | 6662.9 | 52.0 |
|    | S190426c         | NSBH | 2019-04-26 15:21:55    | 2019-04-26 16:03:29    | 2019-04-26 16:14:33 |                                                                     | 1780.4 | 71.0 |
|    | S190503bf        | BBH  | 2019-05-03 18:54:04    | 2019-05-04 10:03:07    | 2019-05-03 18:54:49 |                                                                     | 634.7  | 64.5 |
|    | S190510g         | BNS  | 2019-05-10 02:59:39    | 2019-05-10 05:04:00    | 2019-05-10 03:06:00 |                                                                     | 5481.7 | 87.3 |
|    | S190512at        | BBH  | 2019-05-12 18:07:14    | 2019-05-12 19:05:29    | 2019-05-12 18:09:38 |                                                                     | 847.5  | 95.3 |
|    | S190513bm        | BBH  | 2019-05-13 20:54:28    | 2019-05-13 21:28:46    | 2019-05-13 20:55:53 |                                                                     | 1299.9 | 67.2 |
|    | S190517h         | BBH  | 2019-05-17 05:51:01    | 2019-05-17 07:07:47    | 2019-05-17 06:07:26 |                                                                     | 1072.0 | 52.0 |
|    | S190519bj        | BBH  | 2019-05-19 15:35:44    | 2019-05-19 17:05:40    | 2019-05-19 15:51:06 |                                                                     | 954.2  | 79.5 |
|    | S190521g         | BBH  | 2019-05-21 03:02:29    | 2019-05-21 03:11:37    | 2019-05-21 03:07:04 |                                                                     | 592.9  | 65.4 |
|    | S190521r         | BBH  | 2019-05-21 07:43:59    | 2019-05-21 07:52:58    | 2019-05-21 08:02:45 |                                                                     | 687.3  | 82.4 |
|    | S190602aq        | BBH  | 2019-06-02 17:59:27    | 2019-06-02 18:10:01    | 2019-06-02 18:15:28 |                                                                     | 364.5  | 20.8 |
|    | S190630ag        | BBH  | 2019-06-30 18:52:05    | 2019-06-30 18:57:13    | 2019-06-30 18:58:32 |                                                                     | 3359.7 | 37.6 |
|    | S190701ah        | BBH  | 2019-07-01 20:33:06    | 2019-07-01 20:45:10    | 2019-07-01 20:53:01 |                                                                     | 188.5  | 96.9 |
|    | S190706ai        | BBH  | 2019-07-06 22:26:41    | 2019-07-06 22:54:24    | 2019-07-06 22:45:16 |                                                                     | 1099.7 | 69.7 |
|    | S190707q         | BBH  | 2019-07-07 09:33:26    | 2019-07-07 10:13:54    | 2019-07-07 16:36:51 |                                                                     | 1601.0 | 66.7 |
|    | S190718y         | Terr | 2019-07-18 14:35:12    | 2019-07-18 15:41:44    | 2019-07-18 15:06:02 |                                                                     | 4003.5 | 74.7 |
|    | S190720a         | BBH  | 2019-07-20 00:08:36    | 2019-07-20 00:12:12    | 2019-07-20 00:10:24 |                                                                     | 1667.6 | 67.3 |
|    | S190727h         | BBH  | 2019-07-27 06:03:33    | 2019-07-27 06:12:52    | 2019-07-27 06:13:01 |                                                                     | 736.8  | 94.7 |
|    | S190728q         | BBH  | 2019-07-28 06:45:10    | 2019-07-28 07:00:14    | 2019-07-28 07:00:29 |                                                                     | 810.0  | 96.4 |
|    | S190814bv        | NSBH | 2019-08-14 21:10:39    | 2019-08-14 21:33:14    | 2019-08-14 21:32:46 |                                                                     | 175.7  | 97.7 |

|           |      |                     |                     |                     |        |      |
|-----------|------|---------------------|---------------------|---------------------|--------|------|
| S190828j  | BBH  | 2019-08-28 06:34:05 | 2019-08-28 06:51:03 | 2019-08-28 06:36:40 | 630.7  | 58.6 |
| S190828l  | BBH  | 2019-08-28 06:55:09 | 2019-08-28 07:18:45 | 2019-08-28 07:23:02 | 632.5  | 40.7 |
| S190901ap | BNS  | 2019-09-01 23:31:01 | 2019-09-01 23:37:55 | 2019-09-01 23:31:01 | 4075.6 | 40.2 |
| S190910d  | NSBH | 2019-09-10 01:26:19 | 2019-09-10 01:33:30 | 2019-09-10 01:28:56 | 1051.2 | 33.0 |
| S190910h  | BNS  | 2019-09-10 08:29:58 | 2019-09-10 08:37:20 | 2019-09-10 09:44:54 | 5493.4 | 16.2 |
| S190915ak | BBH  | 2019-09-15 23:57:02 | 2019-09-16 00:04:50 | 2019-09-15 23:59:13 | 637.1  | 87.5 |
| S190923y  | NSBH | 2019-09-23 12:55:59 | 2019-09-23 13:03:03 | 2019-09-23 13:09:17 | 2016.7 | 69.9 |
| S190924h  | BBH  | 2019-09-24 02:18:46 | 2019-09-24 02:26:29 | 2019-09-24 02:23:45 | 515.8  | 81.7 |
| S190930s  | BBH  | 2019-09-30 13:35:41 | 2019-09-30 13:43:50 | 2019-09-30 13:36:35 | 1775.4 | 55.2 |
| S190930t  | NSBH | 2019-09-30 14:34:07 | 2019-09-30 14:41:35 | 2019-09-30 4:36:33  | 9249.9 | 35.5 |
| S191105e  | BBH  | 2019-11-05 14:35:21 | 2019-11-06 18:03:18 | 2019-11-05 14:36:16 | 1716.8 | 65.2 |
| S191109d  | BBH  | 2019-11-09 01:07:17 | 2019-11-09 01:17:30 | 2019-11-09 01:31:52 | 1564.3 | 39.5 |
| S191129u  | BBH  | 2019-11-29 13:40:29 | 2019-11-29 14:23:56 | 2019-11-29 14:12:54 | 1560.0 | 66.3 |
| S191204r  | BBH  | 2019-12-04 17:15:26 | 2019-12-04 17:59:33 | 2019-12-04 18:05:14 | 741.7  | 97.4 |
